# Supplementary material for: Blood pressure control in older adults with hypertension: A systematic review with meta-analysis and meta-regression
Source: PubMed Central journal article supplement — Int J Cardiol Hypertens. 2020 Jul 7;6:100040. doi: 10.1016/j.ijchy.2020.100040 (PMC7803055; doi:10.1016/j.ijchy.2020.100040), 2020-07-07
Supplement: mmc1.pdf [file mmc1.pdf]

## SUPPLEMENTARY TABLES AND FIGURES

Table S1: Search strategies

| PubMed  |                                                                                                                                                                                                                                                                                                                                                                                                                                                                                           |             |
|---------|-------------------------------------------------------------------------------------------------------------------------------------------------------------------------------------------------------------------------------------------------------------------------------------------------------------------------------------------------------------------------------------------------------------------------------------------------------------------------------------------|-------------|
| No      | Search Terms                                                                                                                                                                                                                                                                                                                                                                                                                                                                              | Items found |
| #9      | ((((hypertens*) AND (adults OR adult OR elderly OR aged)) AND (intensive OR strict OR tight OR low OR optimal OR active) AND ("blood pressure" OR antihypertens*) AND (treatment OR management OR therapy OR target OR goal OR control) AND (("cardiovascular outcomes" OR mortality OR morbidity))) AND ( ( Clinical Trial[ptyp] OR Controlled Clinical Trial[ptyp] OR Randomized Controlled Trial[ptyp] ) AND hasabstract[text] AND Humans[Mesh] AND (middle age[MeSH] OR aged[MeSH]))) | 1,282       |
| #8      | Search (("cardiovascular outcomes" OR cardiovascular) OR mortality) OR morbidity                                                                                                                                                                                                                                                                                                                                                                                                          | 4,499,760   |
| #7      | Search (((intensive OR strict OR tight OR low OR optimal OR active)) AND ("blood pressure" OR antihypertens*)) AND (treatment OR management OR therapy OR target OR goal OR control)                                                                                                                                                                                                                                                                                                      | 63,585      |
| #6      | Search (((("randomized controlled trial"[Title]) OR "controlled clinical trial"[Title]) OR "randomized trial"[Title]) OR trial[Title]) OR randomized[Title]                                                                                                                                                                                                                                                                                                                               | 261,134     |
| #5      | Search ("Cardiovascular outcomes" OR mortality OR morbidity)                                                                                                                                                                                                                                                                                                                                                                                                                              | 3,014,437   |
| #4      | Search (treatment OR management OR therapy OR target OR goal OR control)                                                                                                                                                                                                                                                                                                                                                                                                                  | 13,952,795  |
| #3      | Search ("blood pressure" OR antihypertens*)                                                                                                                                                                                                                                                                                                                                                                                                                                               | 476,380     |
| #2      | Search (intensive OR strict OR tight OR low OR optimal OR active)                                                                                                                                                                                                                                                                                                                                                                                                                         | 3,841,252   |
| #1      | Search (hypertens*) AND (adults OR adult OR elderly OR aged)                                                                                                                                                                                                                                                                                                                                                                                                                              | 261,906     |
| Medline |                                                                                                                                                                                                                                                                                                                                                                                                                                                                                           |             |
| No      | Search Terms                                                                                                                                                                                                                                                                                                                                                                                                                                                                              | Items found |
| #6      | #5 AND #4<br>Indexes=MEDLINE Timespan=All years                                                                                                                                                                                                                                                                                                                                                                                                                                           | 1,308       |
| #5      | (((TOPIC: ("randomized controlled trial") OR TOPIC: ("controlled clinical trial")) OR TOPIC: ("randomized trial")) OR TOPIC: (randomized)) OR TOPIC: (trial)<br>Indexes=MEDLINE Timespan=All years                                                                                                                                                                                                                                                                                        | 1,305,048   |
| #4      | #2 AND #1<br>Refined by: MeSH HEADINGS: ( HUMANS )<br>Indexes=MEDLINE Timespan=All years                                                                                                                                                                                                                                                                                                                                                                                                  | 3,691       |
| #3      | #2 AND #1<br>Indexes=MEDLINE Timespan=All years                                                                                                                                                                                                                                                                                                                                                                                                                                           | 3,995       |
| #2      | (((TOPIC: (((intensive) OR strict) OR tight) OR low) OR optimal) OR active) AND TOPIC: ("blood pressure" OR antihypertens*)) AND TOPIC: (((treatment) OR management) OR therapy) OR target) OR goal) OR control)) AND TOPIC: (("cardiovascular outcomes") OR mortality) OR morbidity))<br>Indexes=MEDLINE Timespan=All years                                                                                                                                                              | 12,486      |
| #1      | (TOPIC: (hypertens*) AND TOPIC: (((adults) OR adult) OR elderly) OR aged))<br>Indexes=MEDLINE Timespan=All years                                                                                                                                                                                                                                                                                                                                                                          | 277,842     |
| Embase  |                                                                                                                                                                                                                                                                                                                                                                                                                                                                                           |             |
| No      | Search Terms                                                                                                                                                                                                                                                                                                                                                                                                                                                                              | Items found |
| #5      | #3 AND #4                                                                                                                                                                                                                                                                                                                                                                                                                                                                                 | 409         |
| #4      | #1 AND #2                                                                                                                                                                                                                                                                                                                                                                                                                                                                                 | 1,230       |
| #3      | 'randomized controlled trial':ti,ab,kw OR 'controlled clinical trial':ti,ab,kw OR 'randomized trial':ti,ab,kw OR randomized:ti,ab,kw OR trial:ti,ab,kw                                                                                                                                                                                                                                                                                                                                    | 1,210,684   |
| #2      | (intensive:ti,ab,kw OR strict:ti,ab,kw OR tight:ti,ab,kw OR low:ti,ab,kw OR optimal:ti,ab,kw OR active:ti,ab,kw) AND ('blood pressure':ti,ab,kw OR antihypertens*:ti,ab,kw) AND (treatment:ti,ab,kw OR management:ti,ab,kw OR therapy:ti,ab,kw OR target:ti,ab,kw OR goal:ti,ab,kw OR control:ti,ab,kw) AND ('cardiovascular outcomes':ti,ab,kw OR mortality:ti,ab,kw OR morbidity:ti,ab,kw)                                                                                              | 9,446       |
| #1      | hypertens*:ti,ab,kw AND (adults:ti,ab,kw OR adult:ti,ab,kw OR elderly:ti,ab,kw OR aged:ti,ab,kw)                                                                                                                                                                                                                                                                                                                                                                                          | 101,293     |

**Table S2:** Stepwise drug class protocol

| Study                  | Primary drugs                                                                                          | Secondary additional drugs                    | Tertiary additional drugs                                      |
|------------------------|--------------------------------------------------------------------------------------------------------|-----------------------------------------------|----------------------------------------------------------------|
| ANBP 1981              | Diuretic (T)                                                                                           | ↑dose and/or BBs                              |                                                                |
| BBB 1994               | N/R                                                                                                    |                                               |                                                                |
| Cardio-Sis 2009        | ARBs or ACE-Is or ABs or BBs or Diuretic or CCBs + transdermal clonidine – at investigators discretion |                                               |                                                                |
| COPE 2017              | CCB+ (ARB or BB or Diuretic (T)) separately                                                            | ↑Dose of CCB                                  | ↑dose of CCB in 3 steps of) + any drug in 4 <sup>th</sup> step |
| FEVER 2005             | CCBs                                                                                                   | + Diuretic (T) or any drug class but not CCBs |                                                                |
| HOT 1998               | CCBs                                                                                                   | + ACE-Is or BBs                               | ↑dose of CCB of ACE-Is/or BB - step 4 + diuretic – step 5      |
| HYVET 2008             | Diuretic (T)                                                                                           | + ACE-Is or at ↑dose                          |                                                                |
| JATOS 2008             | CCBs                                                                                                   | ↑dose of CCB + any dug class but not CCB      |                                                                |
| SCOPE 2003             | ARBs                                                                                                   | ↑dose                                         | Other drug but not ACE-Is or ARBs                              |
| SHEP 1989              | Diuretic (T)                                                                                           | Diuretic (T) or ABA or BBs + ↑dose            | ↑dose                                                          |
| SPRINT 2019            | Diuretic (T) + ACE-Is or ARB + CCBs                                                                    |                                               |                                                                |
| STOP-Hypertension 1991 | BBs + Diuretic (T)                                                                                     | + Diuretic or BBs                             |                                                                |
| Syst-China 1998        | CCBs                                                                                                   | +/or replaced ACE-Is and/or diuretic          |                                                                |
| Syst-Eur 1997          | CCBs                                                                                                   | +/or replaced ACE-Is and/or Diuretic at ↑dose |                                                                |
| VALISH 2010            | ARBs                                                                                                   | ↑dose +/or any drug class but not ARBs        |                                                                |
| Wei et al. 2013        | ACE-Is or ARBs or BBs or CCBs or Diuretic (T)                                                          | ↑dose                                         | ↑dose                                                          |

**ABA:** adrenergic blocking agent, **BB:** beta blocker, **CCB:** calcium channel blocker, **T:** thiazide diuretic, **↑:** increasing

**Table S3:** Sub-analysis for systolic versus diastolic BP treatment targets on relative risk reduction of outcome events

| Follow-up Duration                 | Studies (Comparison) | Risk ratio  | 95% CI      | p-value | Heterogeneity  |         |
|------------------------------------|----------------------|-------------|-------------|---------|----------------|---------|
|                                    |                      |             |             |         | I <sup>2</sup> | p-value |
| <b>Major cardiovascular events</b> |                      |             |             |         |                |         |
| Systolic BP                        | 13 (13)              | <b>0.68</b> | 0.59 – 0.78 | 0.000   | 70.81          | 0.000   |
| Diastolic BP                       | 3 (4)                | 1.06        | 0.88 – 1.28 | 0.561   | 36.39          | 0.194   |
| <b>Myocardial infarction</b>       |                      |             |             |         |                |         |
| Systolic BP                        | 12 (12)              | 0.87        | 0.72 – 1.05 | 0.144   | 0.00           | 0.858   |
| Diastolic BP                       | 3 (4)                | 0.88        | 0.72 – 1.07 | 0.199   | 0.00           | 0.821   |
| <b>Stroke</b>                      |                      |             |             |         |                |         |
| Systolic BP                        | 13 (13)              | <b>0.69</b> | 0.61 – 0.76 | 0.000   | 3.85           | 0.408   |
| Diastolic BP                       | 3 (4)                | 1.00        | 0.80 – 1.26 | 0.972   | 0.00           | 0.500   |
| <b>Heart failure</b>               |                      |             |             |         |                |         |
| Systolic BP                        | 11 (11)              | <b>0.53</b> | 0.43 – 0.66 | 0.000   | 1.23           | 0.430   |
| Diastolic BP                       | 0 (0)                | -           | -           | -       | -              | -       |
| <b>Cardiovascular mortality</b>    |                      |             |             |         |                |         |
| Systolic BP                        | 12 (12)              | <b>0.72</b> | 0.61 – 0.84 | 0.000   | 32.21          | 0.133   |
| Diastolic BP                       | 2 (3)                | 1.04        | 0.81 – 1.34 | 0.735   | 0.00           | 0.469   |
| <b>All-cause mortality</b>         |                      |             |             |         |                |         |
| Systolic BP                        | 13 (13)              | <b>0.78</b> | 0.69 – 0.89 | 0.000   | 49.45          | 0.022   |
| Diastolic BP                       | 2 (3)                | 1.06        | 0.89 – 1.25 | 0.525   | 0.00           | 0.753   |

**Table S4:** Sub-analysis for follow-up duration on relative risk reduction of outcome events using systolic BP treatment targets only

| Follow-up Duration                 | Studies (Comparison) | Risk ratio  | 95% CI      | p-value | Heterogeneity  |         |
|------------------------------------|----------------------|-------------|-------------|---------|----------------|---------|
|                                    |                      |             |             |         | I <sup>2</sup> | p-value |
| <b>Major cardiovascular events</b> |                      |             |             |         |                |         |
| < 3 years                          | 5 (5)                | <b>0.60</b> | 0.44– 0.83  | 0.002   | 83.07          | 0.000   |
| ≥ 3 years                          | 8 (8)                | <b>0.74</b> | 0.67 – 0.82 | 0.000   | 20.00          | 0.271   |
| <b>Myocardial infarction</b>       |                      |             |             |         |                |         |
| < 3 years                          | 5 (5)                | 0.85        | 0.58 – 1.26 | 0.421   | 0.00           | 0.983   |
| ≥ 3 years                          | 7 (7)                | 0.87        | 0.70 – 1.09 | 0.221   | 0.00           | 0.444   |
| <b>Stoke</b>                       |                      |             |             |         |                |         |
| < 3 years                          | 5 (5)                | <b>0.66</b> | 0.46 – 0.94 | 0.021   | 56.63          | 0.056   |
| ≥ 3 years                          | 8 (8)                | <b>0.68</b> | 0.60 – 0.77 | 0.000   | 0.00           | 0.868   |
| <b>Heart failure</b>               |                      |             |             |         |                |         |
| < 3 years                          | 5 (5)                | <b>0.48</b> | 0.35 – 0.67 | 0.000   | 0.00           | 0.412   |
| ≥ 3 years                          | 6 (6)                | <b>0.56</b> | 0.41 – 0.76 | 0.000   | 10.15          | 0.351   |
| <b>Cardiovascular mortality</b>    |                      |             |             |         |                |         |
| < 3 years                          | 5 (5)                | <b>0.65</b> | 0.46 – 0.91 | 0.012   | 38.84          | 0.162   |
| ≥ 3 years                          | 7 (7)                | <b>0.74</b> | 0.61 – 0.89 | 0.002   | 33.98          | 0.169   |
| <b>All-cause mortality</b>         |                      |             |             |         |                |         |
| < 3 years                          | 5 (5)                | 0.79        | 0.58 – 1.08 | 0.134   | 68.12          | 0.014   |
| ≥ 3 years                          | 8 (8)                | <b>0.79</b> | 0.69 – 0.90 | 0.000   | 37.26          | 0.127   |

**Table S5:** Sub-analysis for effect of SBP targets on relative risk reduction of outcome events

| SBP target                         | Included studies | Risk ratio | 95% CI      | p-value | Heterogeneity  |         |
|------------------------------------|------------------|------------|-------------|---------|----------------|---------|
|                                    |                  |            |             |         | I <sup>2</sup> | p-value |
| <b>Major cardiovascular events</b> |                  |            |             |         |                |         |
| <120                               | 1                | 0.63       | 0.47 – 0.83 | 0.001   | 0.00           | 1.000   |
| <130                               | 1                | 0.47       | 0.34 – 0.67 | 0.000   | 0.00           | 1.000   |
| <140                               | 5                | 0.76       | 0.64 – 0.89 | 0.001   | 31.15          | 0.214   |
| <150                               | 3                | 0.71       | 0.62 – 0.81 | 0.000   | 0.00           | 0.995   |
| <160                               | 3                | 0.60       | 0.35 – 1.03 | 0.065   | 92.89          | 0.000   |
| <b>Myocardial infarction</b>       |                  |            |             |         |                |         |
| <120                               | 1                | 0.59       | 0.35 – 0.99 | 0.044   | 0.00           | 1.000   |
| <130                               | 1                | 0.66       | 0.19 – 2.33 | 0.519   | 0.00           | 1.000   |
| <140                               | 4                | 0.96       | 0.56 – 1.66 | 0.891   | 0.00           | 0.944   |
| <150                               | 3                | 0.76       | 0.53 – 1.10 | 0.146   | 0.00           | 0.650   |
| <160                               | 3                | 1.04       | 0.79 – 1.37 | 0.796   | 0.00           | 0.807   |
| <b>Stroke</b>                      |                  |            |             |         |                |         |
| <120                               | 1                | 0.50       | 0.25 – 1.00 | 0.049   | 0.00           | 1.000   |
| <130                               | 1                | 0.44       | 0.14 – 1.42 | 0.170   | 0.00           | 1.000   |
| <140                               | 5                | 0.73       | 0.60 – 0.89 | 0.002   | 22.77          | 0.269   |
| <150                               | 3                | 0.67       | 0.54 – 0.82 | 0.000   | 0.00           | 0.664   |
| <160                               | 3                | 0.60       | 0.41 – 0.87 | 0.008   | 53.36          | 0.117   |
| <b>Heart failure</b>               |                  |            |             |         |                |         |
| < 120                              | 1                | 0.42       | 0.31 – 0.96 | 0.040   | 0.00           | 1.000   |
| <130                               | 1                | 0.43       | 0.11 – 1.63 | 0.213   | 0.00           | 1.000   |
| <140                               | 4                | 0.54       | 0.29 – 0.99 | 0.046   | 45.41          | 0.139   |
| <150                               | 3                | 0.52       | 0.33 – 0.85 | 0.008   | 48.06          | 0.146   |
| <160                               | 2                | 0.51       | 0.31 – 0.85 | 0.010   | 0.00           | 0.638   |
| <b>Cardiovascular mortality</b>    |                  |            |             |         |                |         |
| <120                               | 1                | 0.42       | 0.15 – 1.18 | 0.100   | 0.00           | 1.000   |
| <130                               | 1                | 0.53       | 0.30 – 0.94 | 0.029   | 0.00           | 1.000   |
| <140                               | 4                | 0.70       | 0.52 – 0.94 | 0.016   | 21.58          | 0.281   |
| <150                               | 3                | 0.76       | 0.63 – 0.92 | 0.004   | 0.00           | 0.782   |
| <160                               | 3                | 0.65       | 0.34 – 1.24 | 0.189   | 73.61          | 0.023   |
| <b>All-cause mortality</b>         |                  |            |             |         |                |         |
| <120                               | 1                | 0.70       | 0.45– 1.09  | 0.117   | 0.00           | 1.000   |
| <130                               | 1                | 0.52       | 0.33 – 0.81 | 0.004   | 0.00           | 1.000   |
| <140                               | 5                | 0.81       | 0.62 – 1.05 | 0.104   | 58.19          | 0.049   |
| <150                               | 3                | 0.81       | 0.71 – 0.92 | 0.001   | 0.00           | 0.479   |
| <160                               | 3                | 0.83       | 0.56 – 1.23 | 0.346   | 66.45          | 0.051   |

**Table S6:** Overall NNT and NNH for outcome events

| Outcome events             | Studies (Comparison) | N     |       | Events |      | NNT        |
|----------------------------|----------------------|-------|-------|--------|------|------------|
|                            |                      | ITx   | STx   | ITx    | STx  |            |
| Major cardiovascular event | 16 (17)              | 36599 | 29291 | 1892   | 2071 | 38         |
| Myocardial infarction      | 15 (16)              | 31758 | 24421 | 447    | 377  | 502        |
| Stroke                     | 16 (17)              | 36599 | 29291 | 795    | 926  | 91         |
| Heart failure              | 11 (11)              | 18694 | 17681 | 134    | 242  | 112        |
| Cardiovascular mortality   | 14 (15)              | 33802 | 26960 | 688    | 744  | 113        |
| All-cause mortality        | 15 (16)              | 35535 | 28228 | 1449   | 1424 | 85         |
|                            |                      |       |       |        |      | <b>NNH</b> |
| Hypotension related events | 5 (5)                | 11757 | 11301 | 880    | 853  | 778        |

*ITx: intensive treatment, N: total number of participants, NNH: number needed to harm, NNT: number needed to treat, STx: standard treatment*

**Table S7:** Success and withdrawal rates of included studies

| Included studies | Success % |      | Weighed means |       | Withdrawal % |     | Weighed means |      |
|------------------|-----------|------|---------------|-------|--------------|-----|---------------|------|
|                  | ITx       | STx  | ITx           | STx   | ITx          | STx | ITx           | STx  |
| ANBP 1981        | 70.0      | 28   | 1.85          | 0.80  |              |     |               |      |
| Cardio-Sis 2009  | 72.2      | 66.9 | 3.62          | 3.64  |              |     |               |      |
| COPE 2017        | 85.9      | 36.1 | 13.39         | 4.50  |              |     |               |      |
| HYVET 2008       | 48.0      | 19.9 | 8.5           | 3.74  | 3.6          | 7.2 | 1.07          | 0.53 |
| JATOS 2008       | 64.9      |      | 12.92         |       | 3.6          | 3.1 | 0.53          | 0.61 |
| SCOPE 2003       |           |      |               |       | 15           | 17  | 3.26          | 2.85 |
| SHEP 1989        | 60.0      | 33   | 2.39          | 0.35  |              |     |               |      |
| Syst-Eur 1997    | 43.5      | 21.4 | 9.38          | 4.83  | 0.5          | 5.5 | 0.98          | 1.17 |
| VALISH 2010      | 67.5      | 47.8 | 9.38          | 7.21  | 2.6          | 2.8 | 0.33          | 0.40 |
| Wei et al. 2013  |           |      |               |       | 0.3          | 1.4 | 0.04          | 0.05 |
| Total            |           |      | 61.29         | 25.08 |              |     | 5.25          | 7.4  |

*ITx: intensive treatment, STx: standard treatment*

**Table S8:** Assessment of study quality – JADAD SCORE of included studies

| Study, Author, Year                                     | Randomization | Randomization described and appropriate | Blinding    | Blinding described and appropriate | An account of all patients included | Total Score<br>5 |
|---------------------------------------------------------|---------------|-----------------------------------------|-------------|------------------------------------|-------------------------------------|------------------|
| <b>ANBP</b><br>Report by the Management Committee, 1981 | 1             | Not described                           | 1           | 1                                  | 1                                   | 4                |
| <b>BBB</b><br>Hansson, 1994                             | 1             | Not described                           | 1           | 1                                  | 1                                   | 4                |
| <b>Cardio-Sis</b><br>Verdecchia et al., 2009;           | 1             | 1                                       | 1           | 1                                  | 1                                   | 5                |
| <b>COPE</b><br>Umemoto et al., 2017                     | 1             | 1                                       | 1           | 1                                  | 1                                   | 5                |
| <b>FEVER</b><br>Liu et al., 2005                        | 1             | 1                                       | 1           | 1                                  | 1                                   | 5                |
| <b>HOT</b><br>Hansson et al., 1998                      | 1             | 1                                       | 1           | 1                                  | 1                                   | 5                |
| <b>HVET</b><br>Beckett et al., 2008                     | 1             | 1                                       | 1           | 1                                  | 1                                   | 5                |
| <b>JATOS</b><br>JATOS Study Group, 2008                 | 1             | 1                                       | 1           | 1                                  | 1                                   | 5                |
| <b>SCOPE</b><br>Lithell et al., 2003                    | 1             | 1                                       | 1           | 1                                  | 1                                   | 5                |
| <b>SHEP</b><br>Perry et al., 1989                       | 1             | 1                                       | 1           | 1                                  | 1                                   | 5                |
| <b>SPRINT</b><br>Attar et al., 2019                     | 1             | 1                                       | Not blinded | Not described                      | 1                                   | 3                |
| <b>STOP-Hypertension</b><br>Dahlöf et al., 1991         | 1             | Not described                           | 1           | 1                                  | 1                                   | 4                |
| <b>Syst-China</b><br>Lui et al., 1998                   | 1             | 1                                       | 1           | 1                                  | 1                                   | 5                |
| <b>Syst-Eur</b><br>Staessen et al., 1997                | 1             | 1                                       | 1           | 1                                  | 1                                   | 5                |
| <b>VALISH</b><br>Ogihara et al., 2010                   | 1             | 1                                       | 1           | 1                                  | 1                                   | 5                |
| Wei et al., 2013                                        | 1             | 1                                       | 1           | 1                                  | 1                                   | 5                |

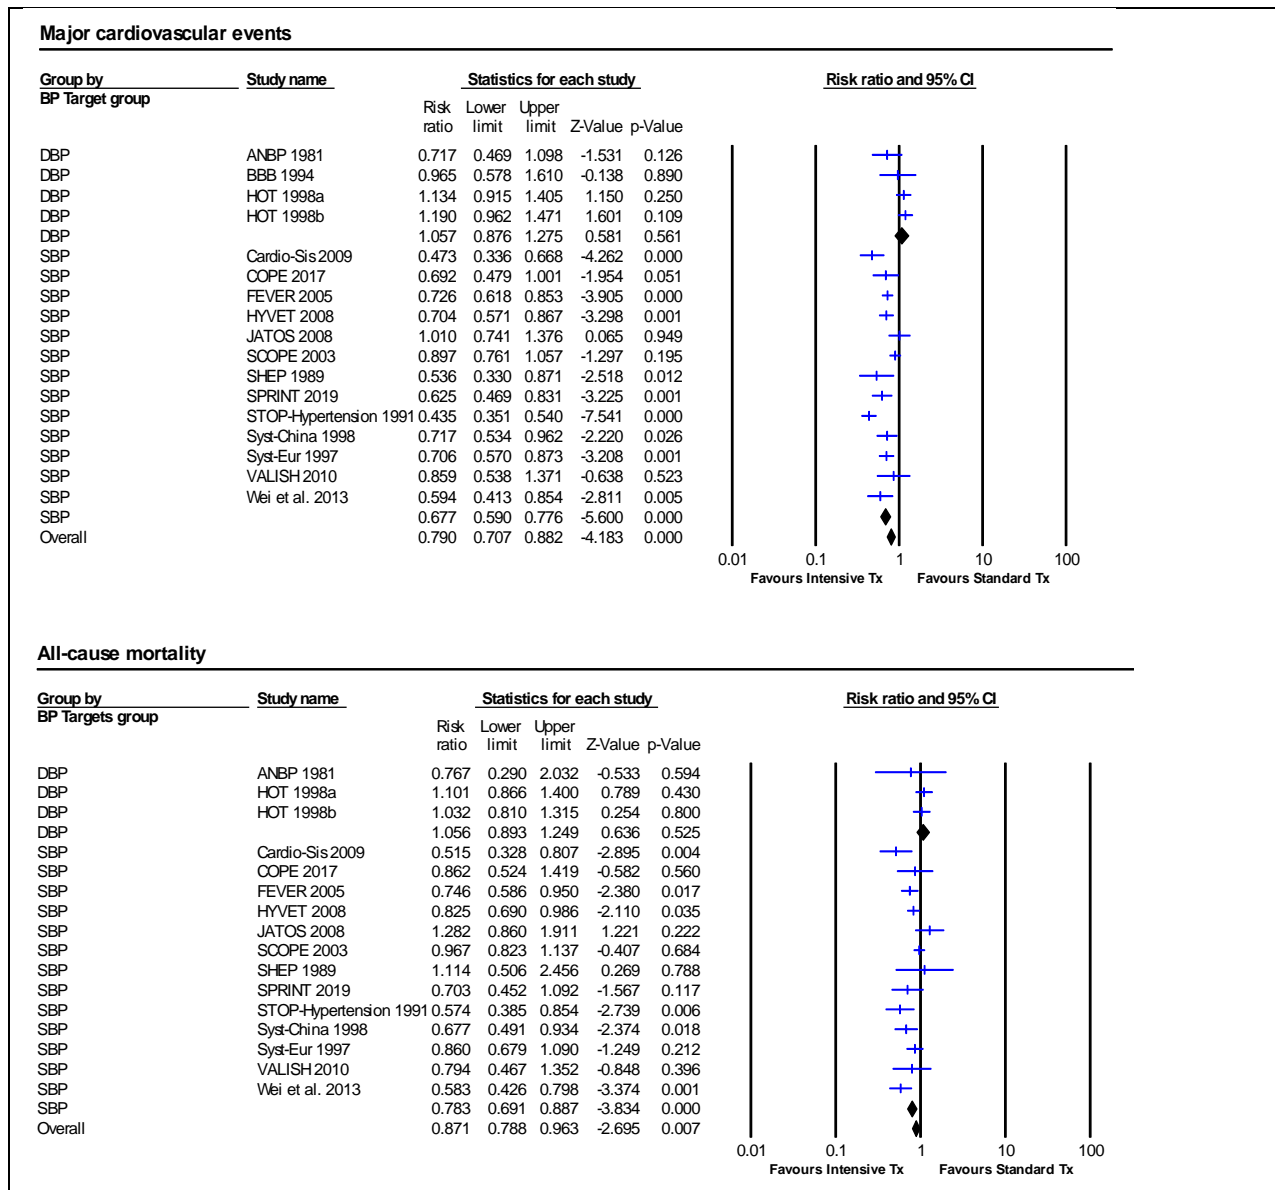

**Figure S1:** Sub-analysis for SBP versus DBP treatment targets on relative risk reduction of major cardiovascular events and all-cause mortality

A *p*-value < 0.05 represents a significant pooled point of estimate of risk ratio. Short vertical lines across each horizontal lines and horizontal lines represents risk ratio and 95% confidence interval (CI) for each study. The vertical line on the scale 1 interval across all horizontal lines represents the estimate of overall risk ratio. The diamond represents the 95% CI for pooled estimates of effect of risk ratio. Tx represent treatment.



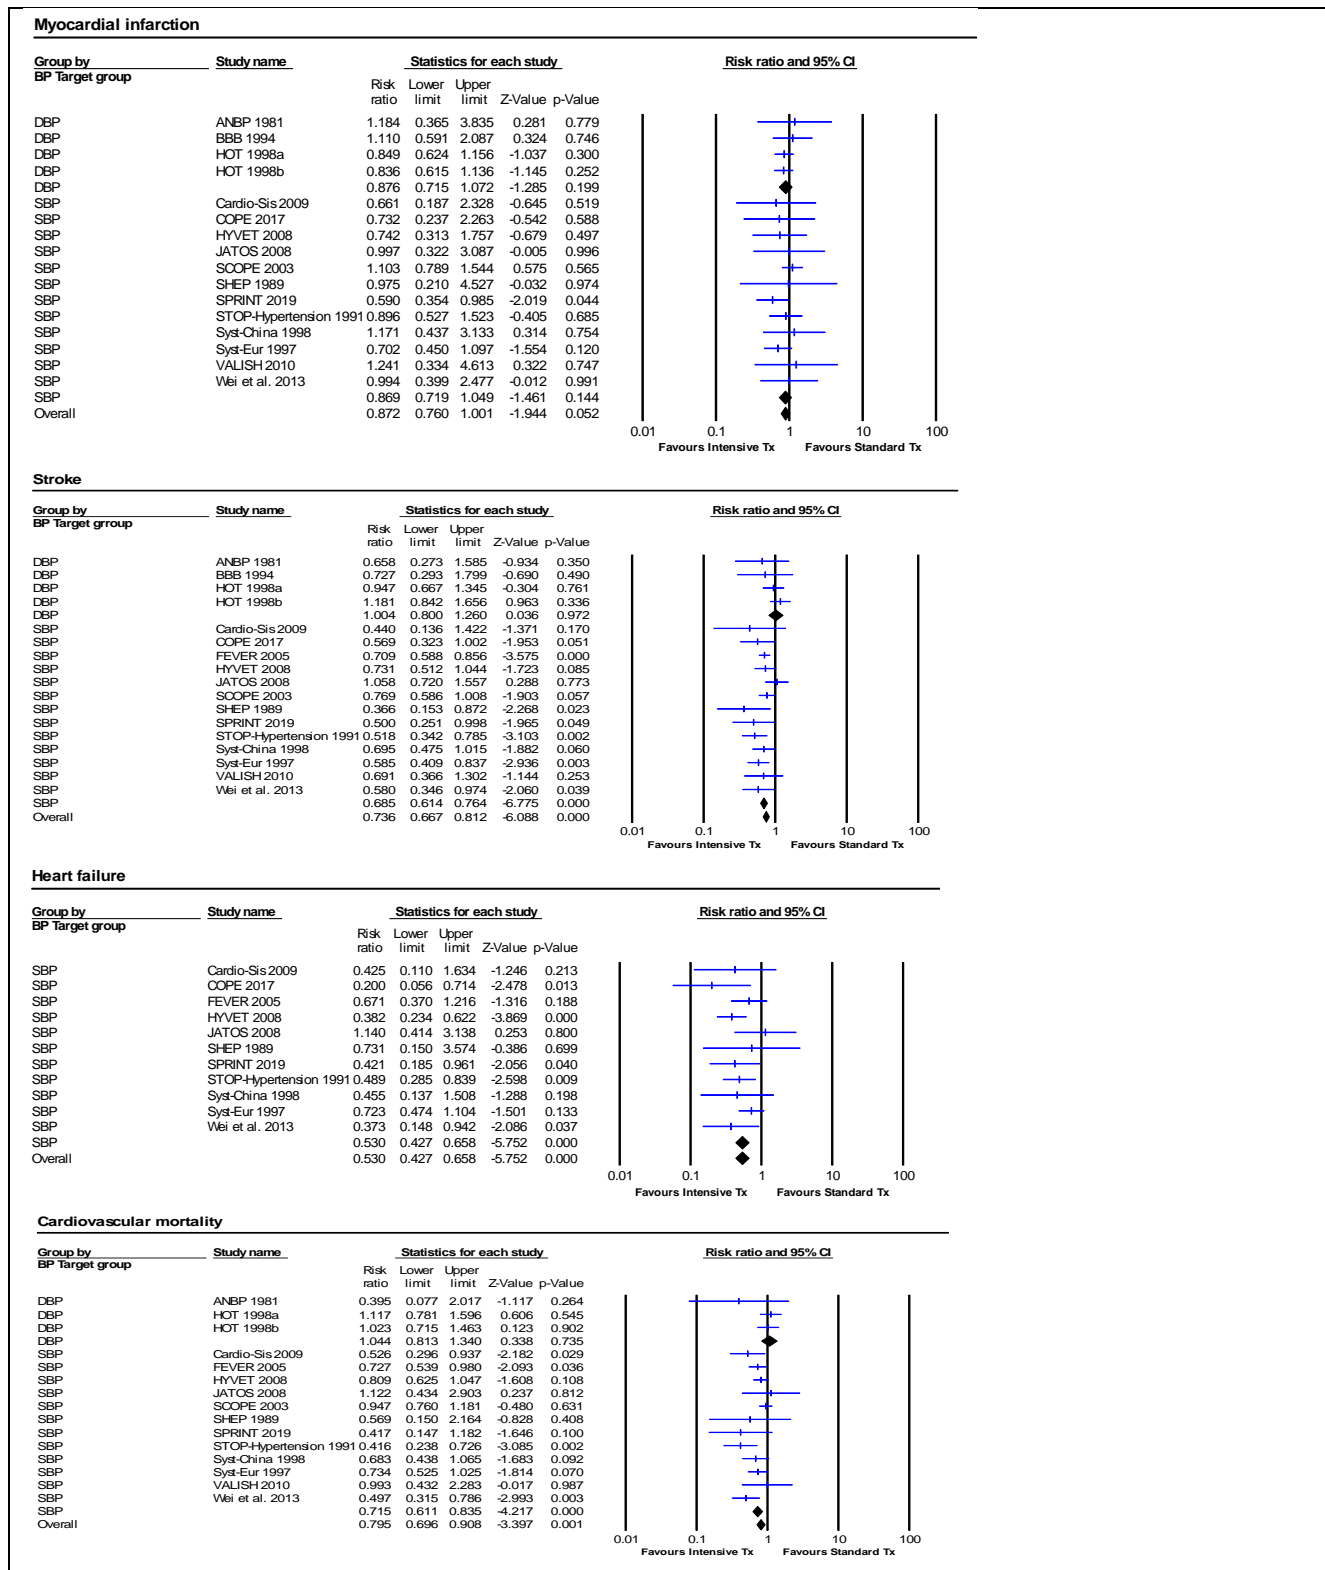

**Figure S2:** Sub-analysis for SBP versus DBP treatment targets on relative risk reduction of cardiovascular outcome events

A p-value < 0.05 represents a significant pooled point of estimate of risk ratio. Short vertical lines across each horizontal lines and horizontal lines represents risk ratio and 95% confidence interval (CI) for each study. The vertical line on the scale 1 interval across all horizontal lines represents the estimate of overall risk ratio. The diamond represents the 95% CI for pooled estimates of effect of risk ratio. Tx represent treatment.

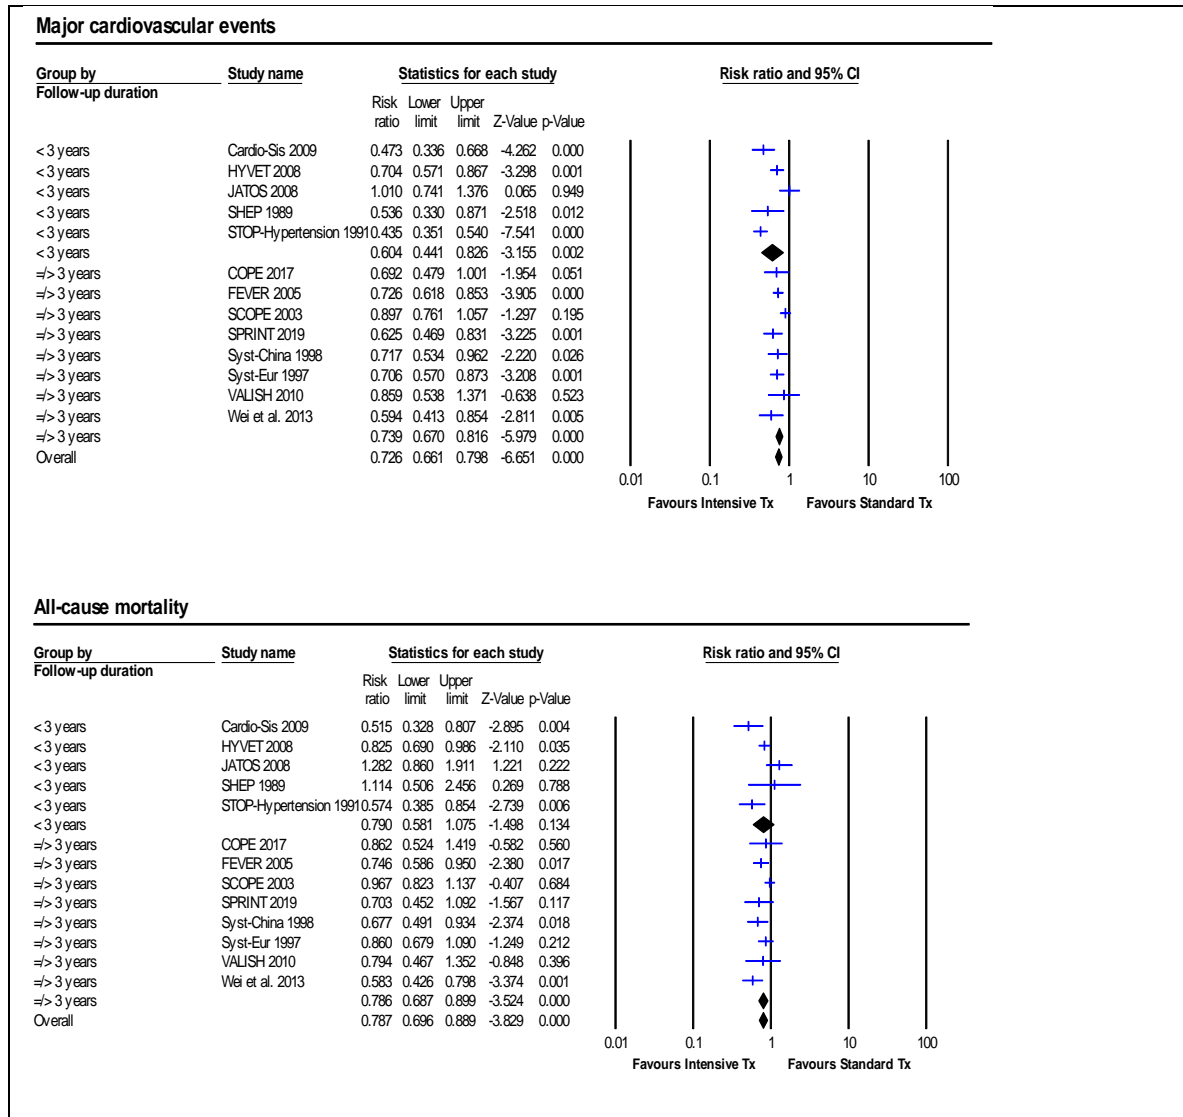

**Figure S3:** Sub-analysis for follow-up duration on relative risk reduction of major cardiovascular events and all-cause mortality for SBP treatment targets only

A p-value < 0.05 represents a significant pooled point of estimate of risk ratio. Short vertical lines across each horizontal lines and horizontal lines represents risk ratio and 95% confidence interval (CI) for each study. The vertical line on the scale 1 interval across all horizontal lines represents the estimate of overall risk ratio. The diamond represents the 95% CI for pooled estimates of effect of risk ratio. Tx represent treatment.

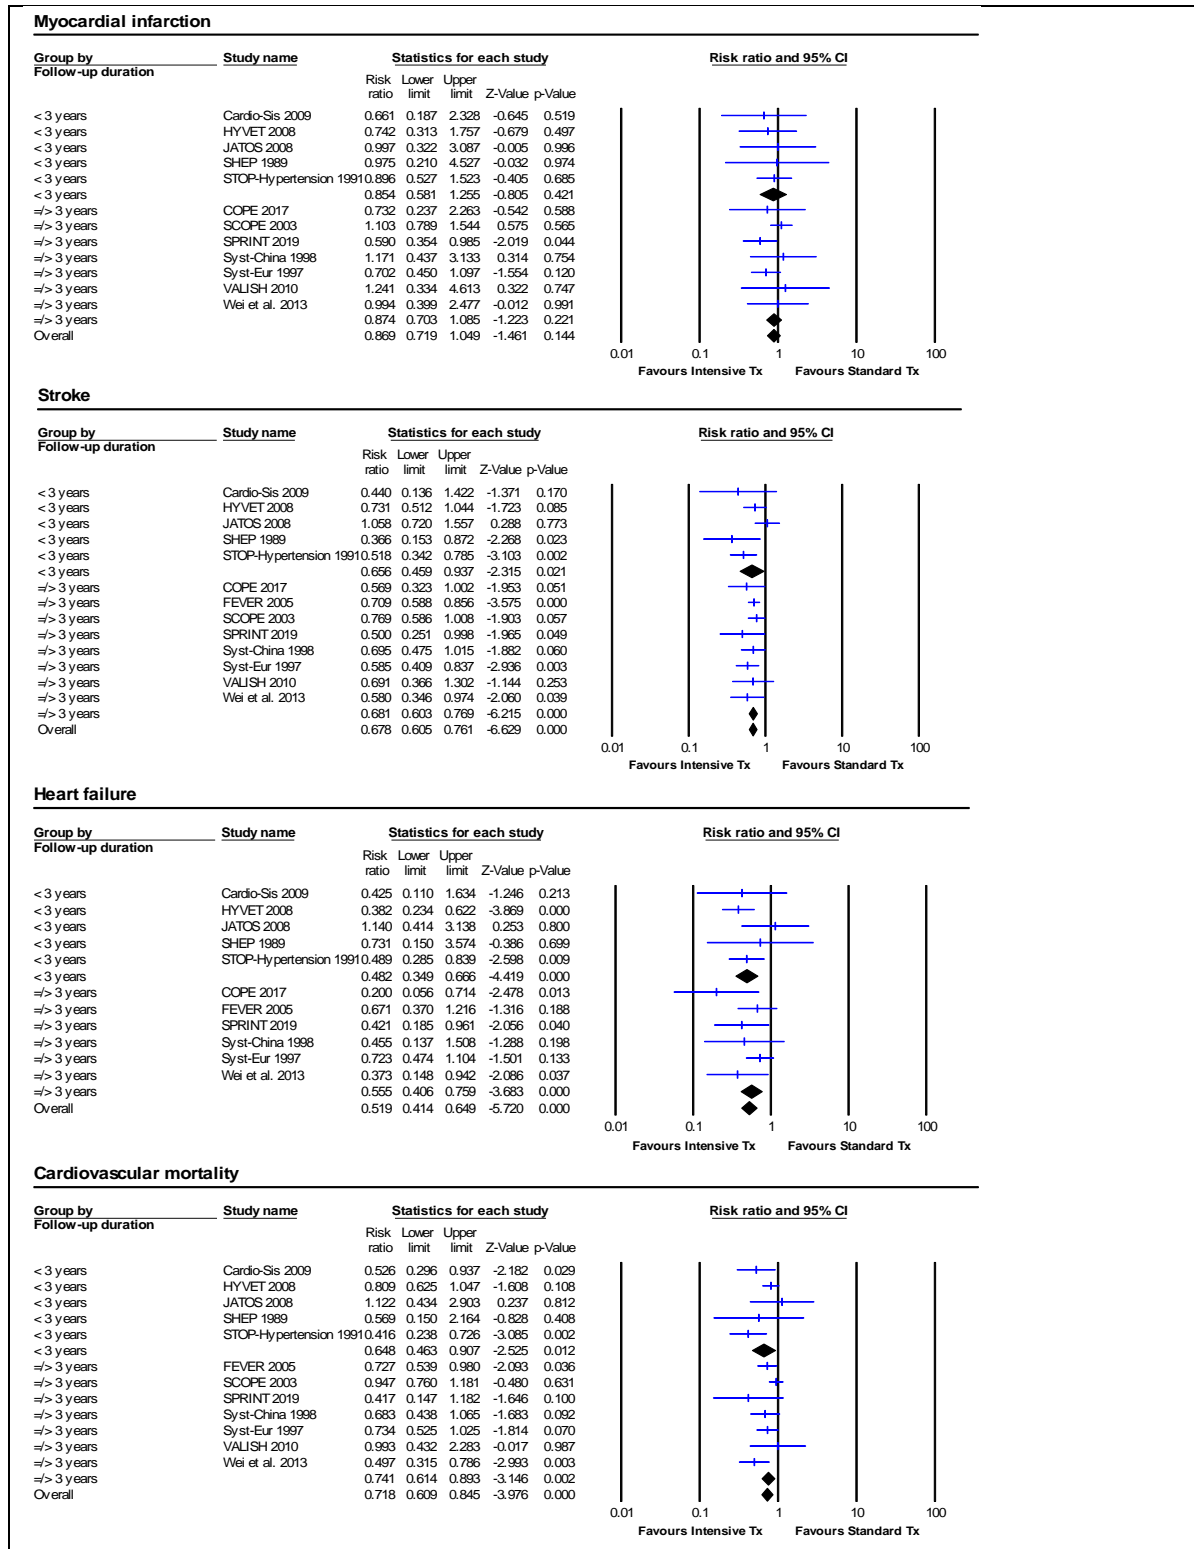

**Figure S4:** Sub-analysis for follow-up duration on relative risk reduction of cardiovascular outcomes events for SBP treatment targets only

A p-value < 0.05 represents a significant pooled point of estimate of risk ratio. Short vertical lines across each horizontal lines and horizontal lines represents risk ratio and 95% confidence interval (CI) for each study. The vertical line on the scale 1 interval across all horizontal lines

represents the estimate of overall risk ratio. The diamond represents the 95% CI for pooled estimates of effect of risk ratio. Tx represent treatment.

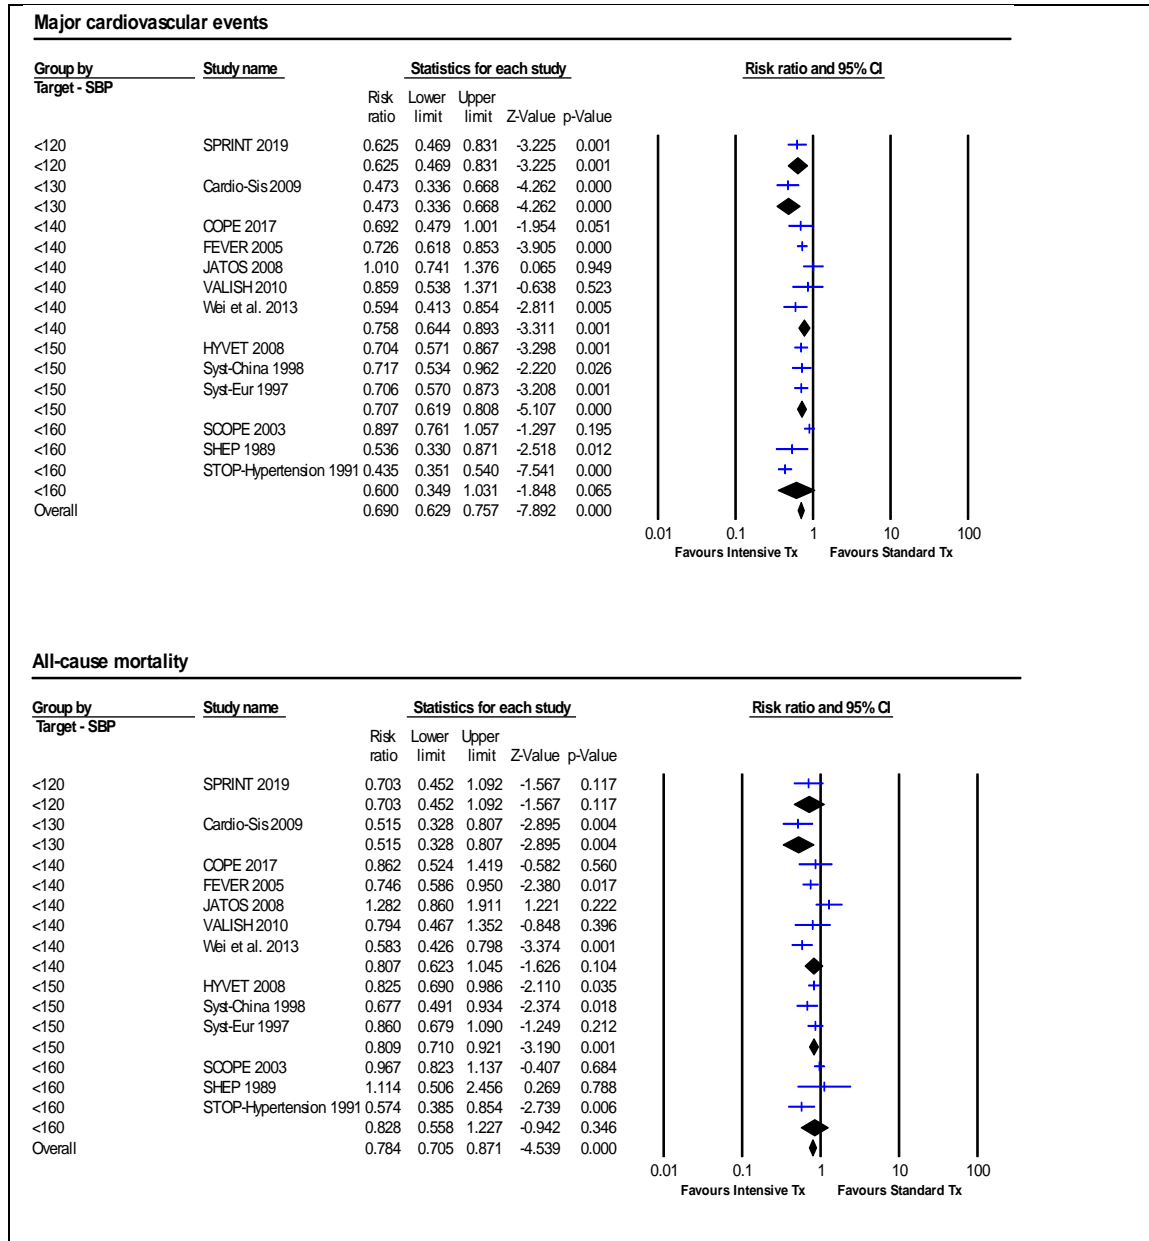

**Figure S5:** Sub-analysis for effect of SBP treatment targets on relative risk reduction of major cardiovascular events and all-cause mortality

A p-value < 0.05 represents a significant pooled point of estimate of risk ratio. Short vertical lines across each horizontal lines and horizontal lines represents risk ratio and 95% confidence interval (CI) for each study. The vertical line on the scale 1 interval across all horizontal lines represents the estimate of overall risk ratio. The diamond represents the 95% CI for pooled estimates of effect of risk ratio. Tx represent treatment.

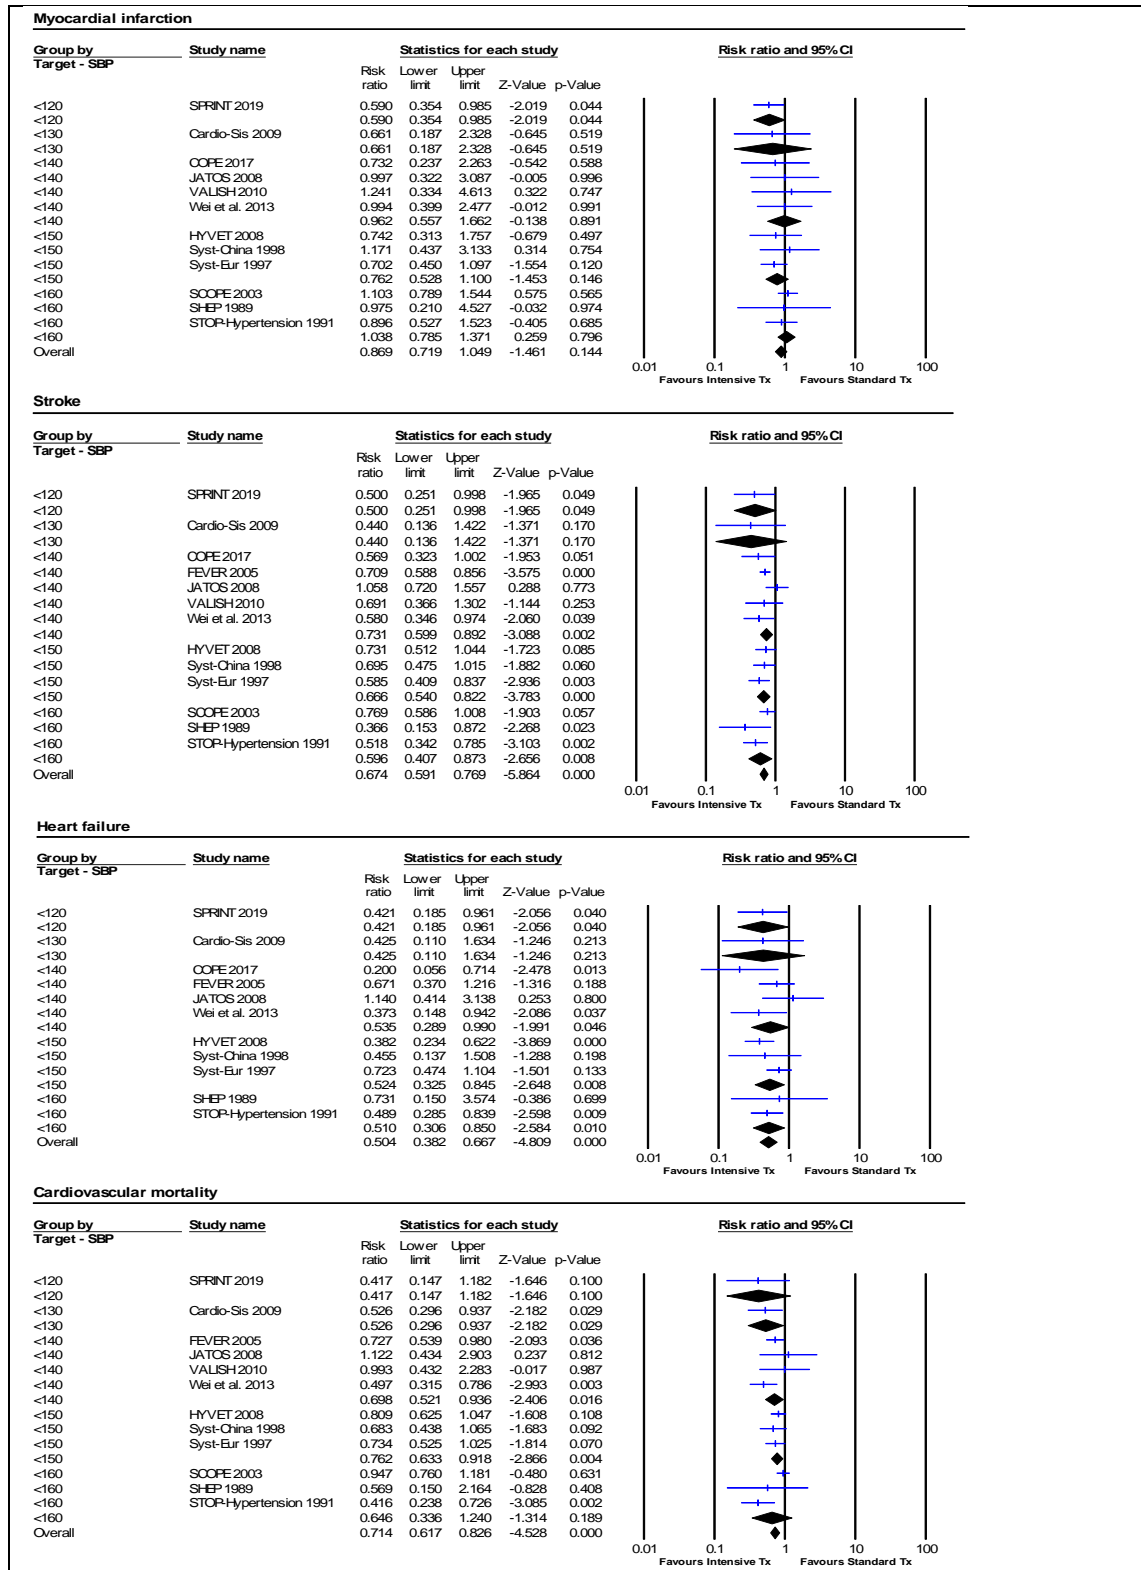

**Figure S6:** Sub-analysis for effect of SBP treatment targets on relative risk reduction of cardiovascular outcomes events

A p-value < 0.05 represents a significant pooled point of estimate of risk ratio. Short vertical lines across each horizontal lines and horizontal lines represents risk ratio and 95% confidence interval (CI) for each study. The vertical line on the scale 1 interval across all horizontal lines represents the estimate of overall risk ratio. The diamond represents the 95% CI for pooled estimates of effect of risk ratio. Tx represent treatment

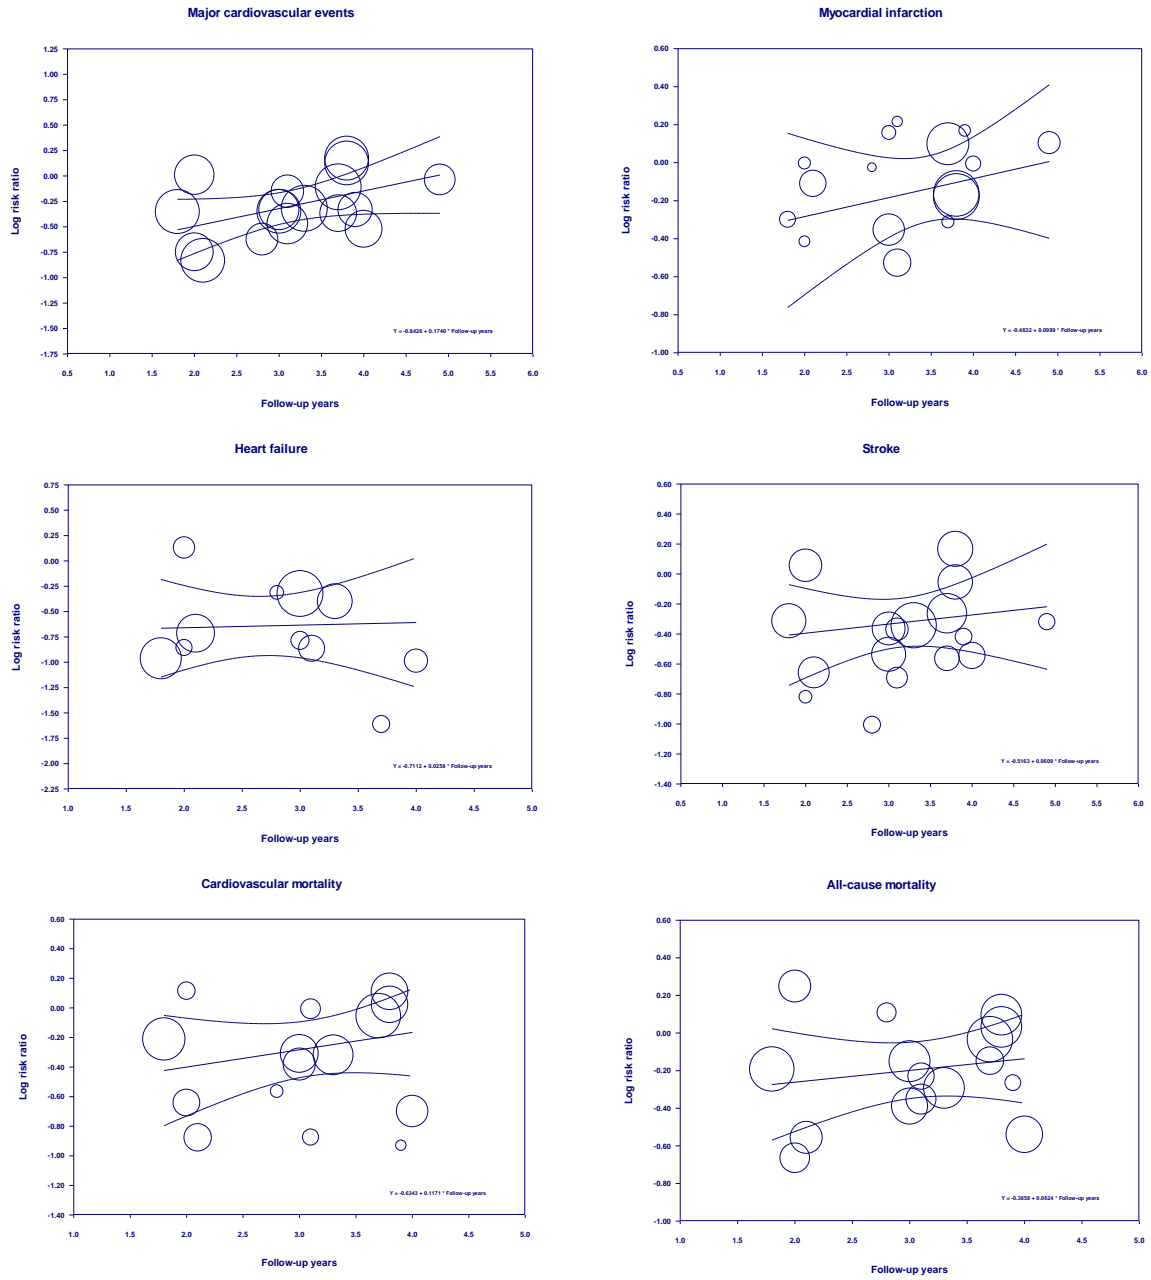

**Figure S7:** Meta-regression on follow-up years for relative risk reduction of outcome events

The p-value for MCEs, MI, Stroke, HF, CV mortality and All-cause mortality are respectively 0.028, 0.337, 0.496, 0.884, 0.251 and 0.445.

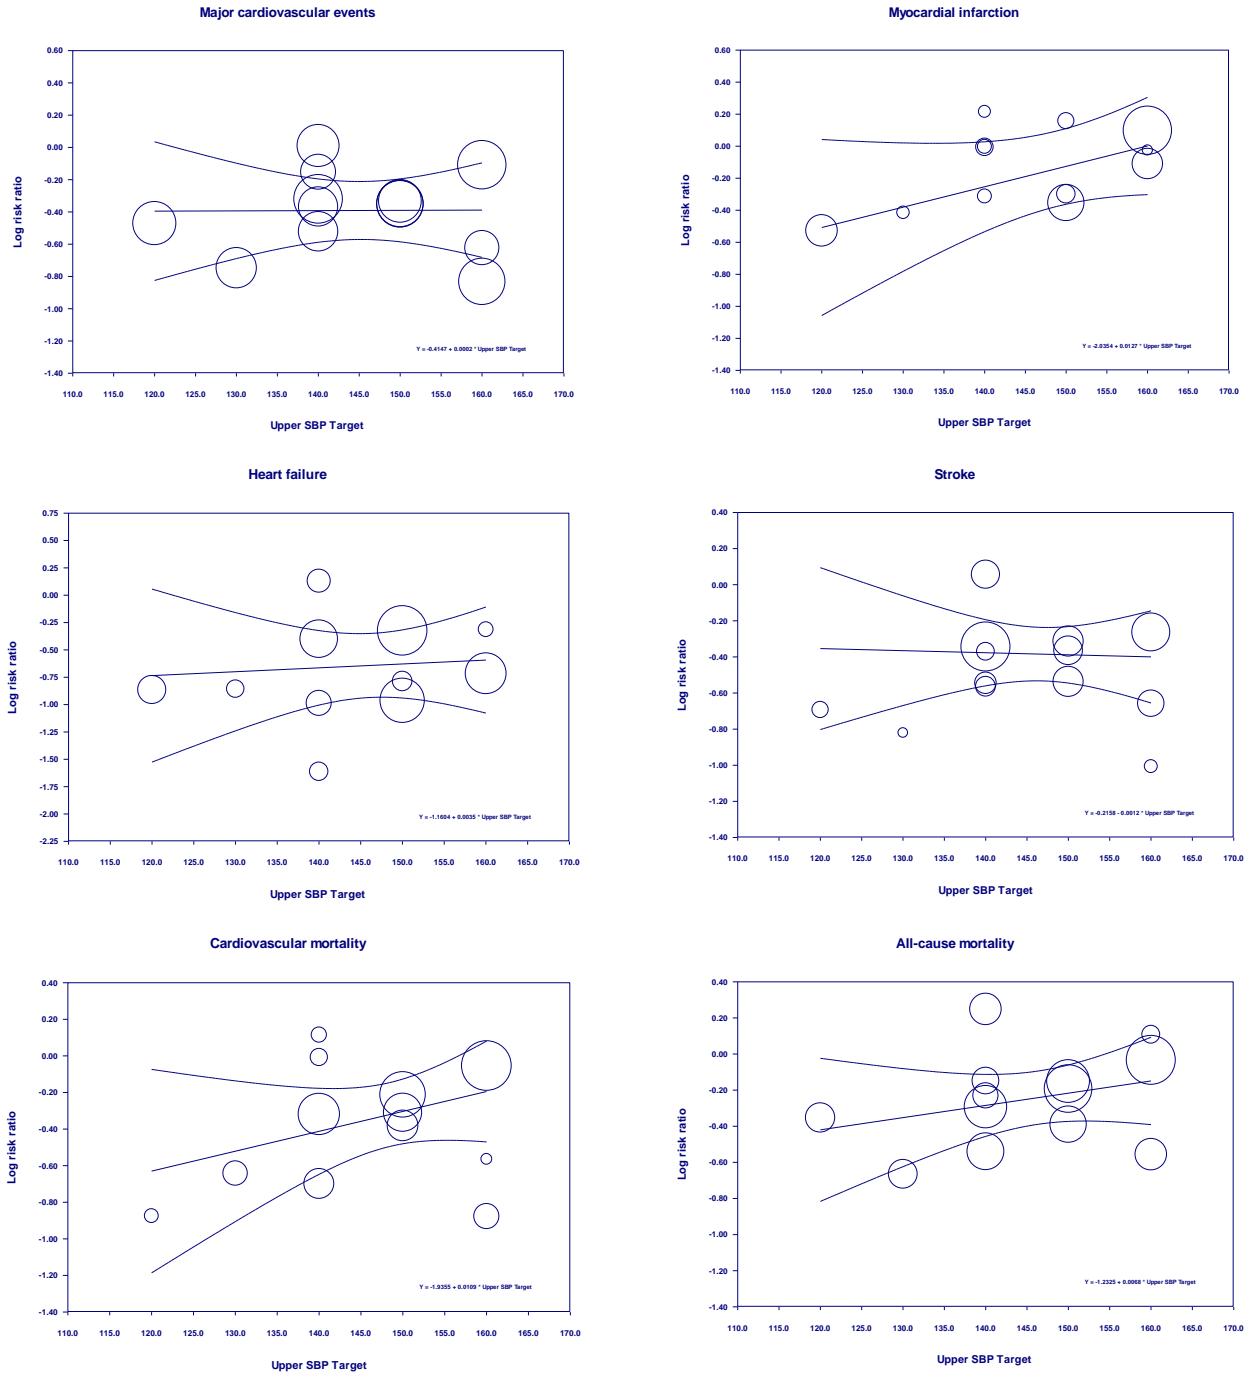

**Figure S8:** Meta-regression on upper SBP treatment targets for relative risk reduction of outcome measures

The p-value for MCEs, MI, Stroke, HF, CV mortality and All-cause mortality are respectively 0.980, 0.070, 0.858, 0.757, 0.151 and 0.237

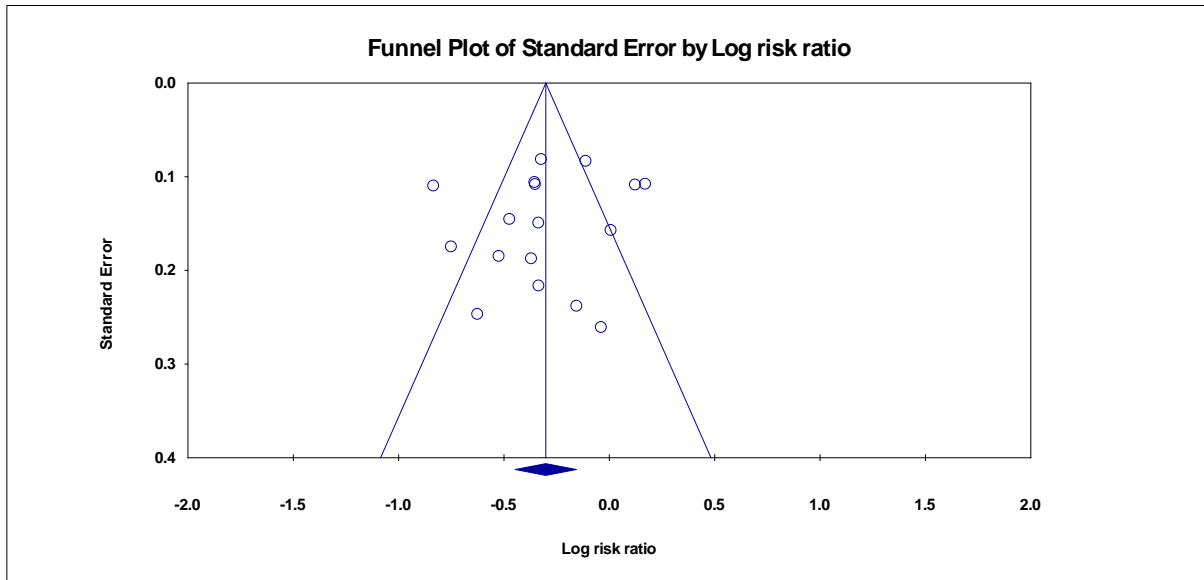

Figure S9: Funnel plot for major cardiovascular events [intercept = -1.17 (95% CI -4.62–2.28),  $p=0.481$ ]

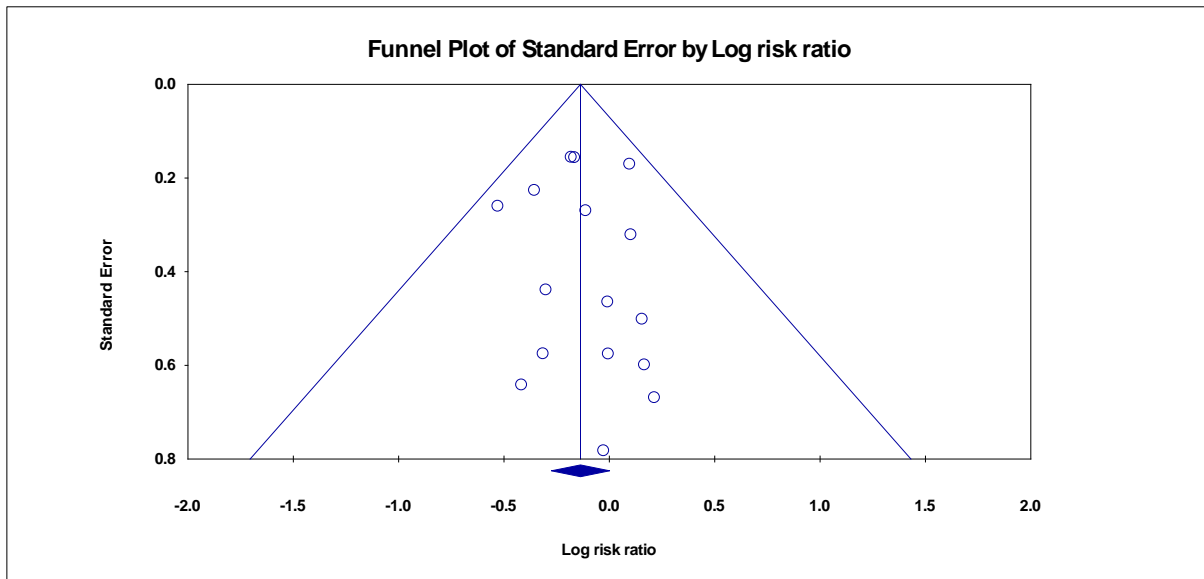

Figure S10: Funnel plot for myocardial infarction [intercept = 0.14(95% CI -0.64–0.91),  $p=0.714$ ]



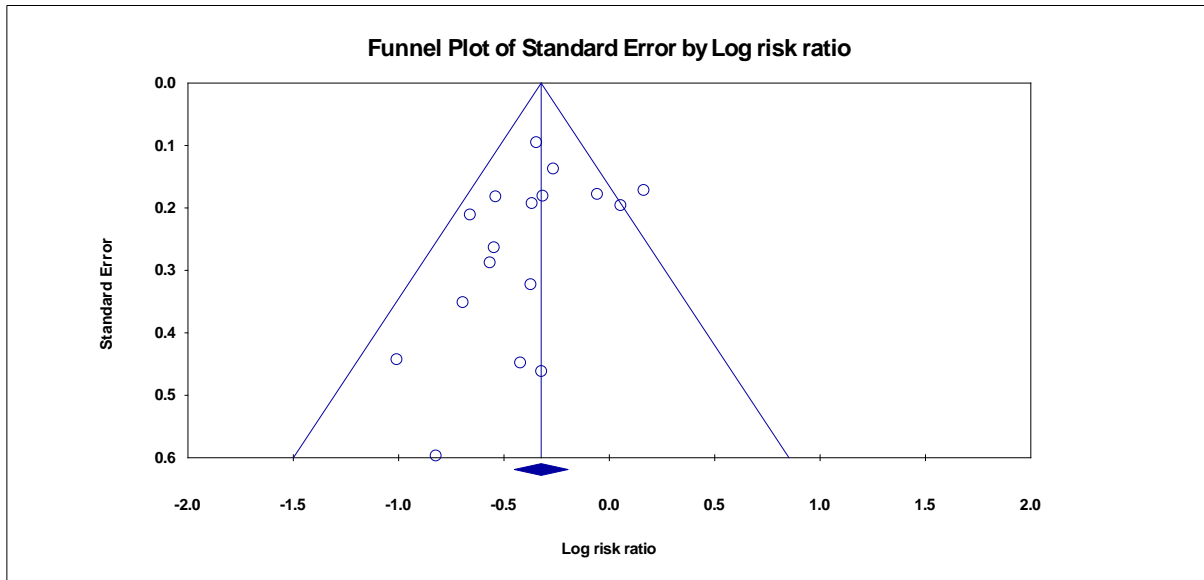

Figure S11: Funnel plot for stroke [intercept = -0.94 (95% CI -2.36–0.48),  $p=0.177$ ]

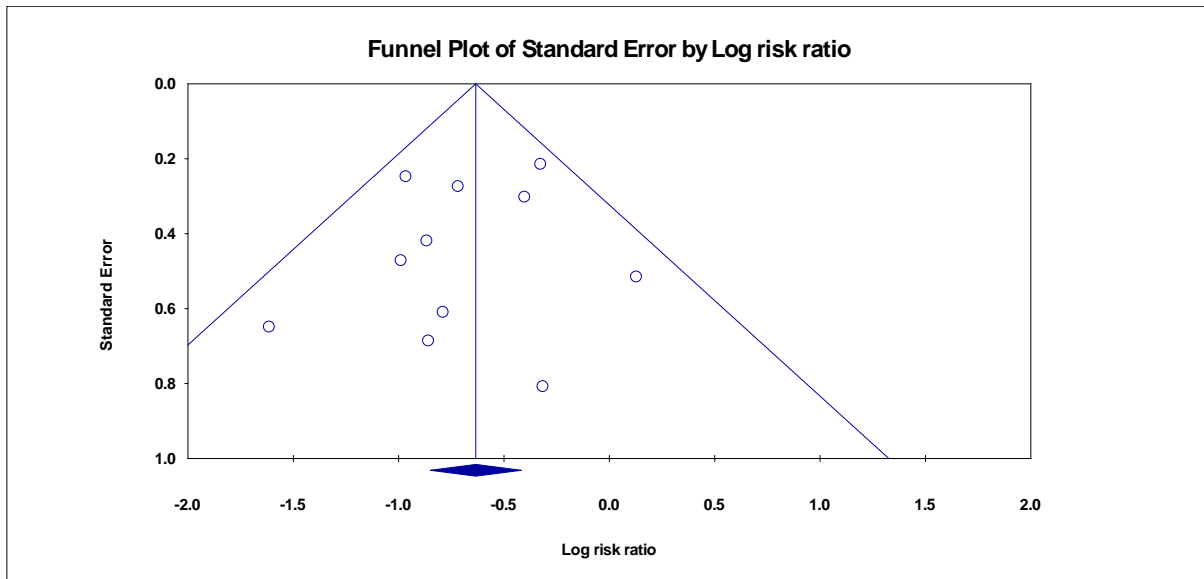

Figure S12: Funnel plot for heart failure [intercept = -0.53(95% CI -2.28–1.23),  $p=0.515$ ]

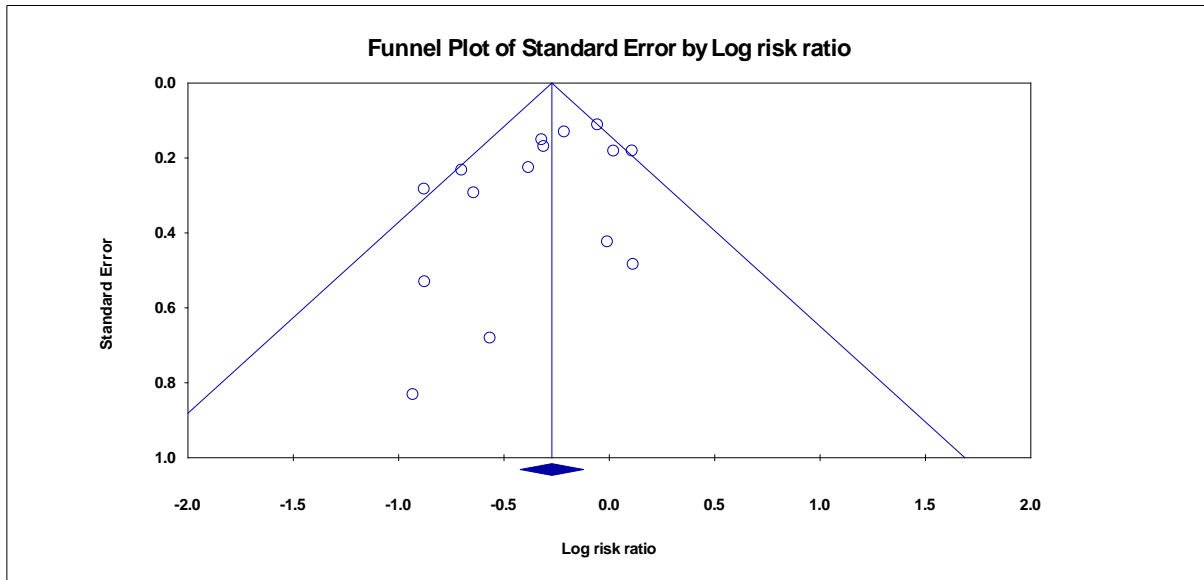

Figure S13: Funnel plot for cardiovascular mortality [intercept = -1.2(95% CI -2.63–0.24), p=0.096]

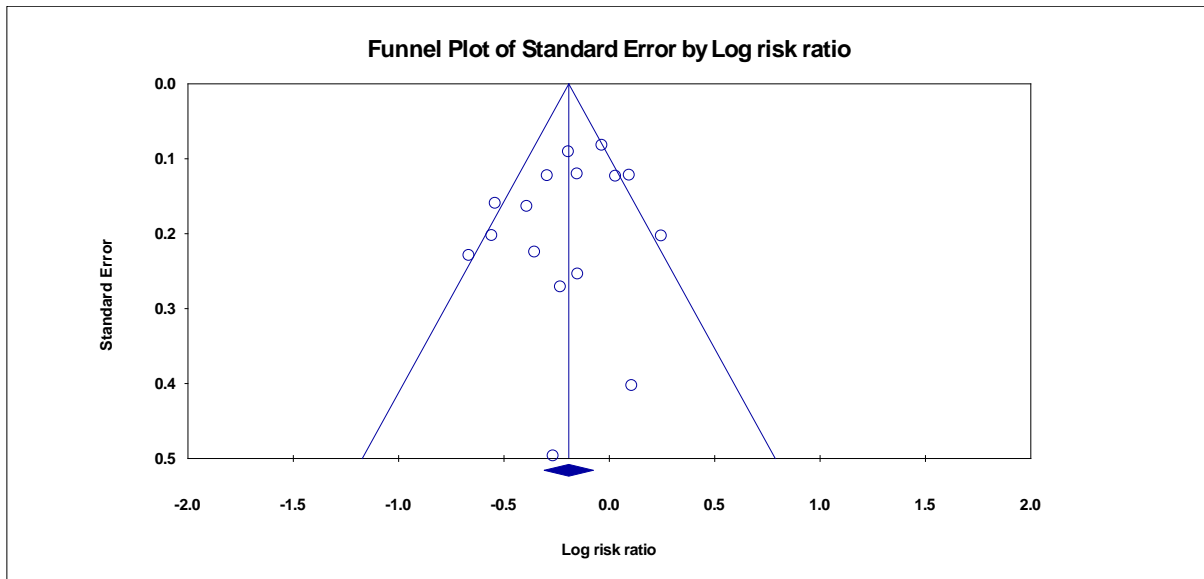

Figure S14: Funnel plot for all-cause mortality [intercept = -1.0(95% CI -2.87–0.88), p=0.273]
